# Supplementary material for: The development and validation of a prognostic prediction modeling study in acute myocardial infarction patients after percutaneous coronary intervention: hemorrhea and major cardiovascular adverse events
Source: PubMed Central journal article supplement — J Thorac Dis. 2024 Sep 26;16(9):6216–28. doi: 10.21037/jtd-24-1362 (PMC11494537; doi:10.21037/jtd-24-1362), 2024-09-26
Supplement: jtd-16-09-6216-dss.pdf [file jtd-16-09-6216-dss.pdf]

## Data Sharing Statement

|                     |                                                                                                                                                     |                                                                                                                                       |
|---------------------|-----------------------------------------------------------------------------------------------------------------------------------------------------|---------------------------------------------------------------------------------------------------------------------------------------|
| <b>Article Info</b> | <a href="https://dx.doi.org/10.21037/jtd-24-1362">https://dx.doi.org/10.21037/jtd-24-1362</a>                                                       |                                                                                                                                       |
| <b>Item</b>         | <b>Question</b>                                                                                                                                     | <b>Authors' Response<br/>(place "-" if not applicable)</b>                                                                            |
| 1                   | Would you like to share data collected for your study to others?                                                                                    | Yes.                                                                                                                                  |
| 2                   | If not, would you like to share the reason for your decision?                                                                                       | -                                                                                                                                     |
| 3                   | What data in particular will be shared?                                                                                                             | According to hospital policy, we can only provide a small amount of raw data according to hospital policy to protect patient privacy. |
| 4                   | Any other documents will be shared? Such as study protocol, statistical analysis plan, informed consent form, clinical study report, analytic code. | Yes, we can provide code files.                                                                                                       |
| 5                   | When will data availability begin?                                                                                                                  | From the publication date.                                                                                                            |
| 6                   | When will data availability end?                                                                                                                    | One year within the publication date, since the technique or survival data may be updated over time.                                  |
| 7                   | To whom will you share the data?                                                                                                                    | Cardiologists interested in related research.                                                                                         |
| 8                   | For what type of analysis or purpose?                                                                                                               | For data processing and model reuse.                                                                                                  |
| 9                   | How or where can the data/documents be obtained?                                                                                                    | Emails could be sent to the address below to obtain the shared data: zijiechen99@163.com.                                             |
| 10                  | Any other restrictions?                                                                                                                             | We may balance the potential benefits and risks for each request and then provide the data that could be shared.                      |
