# Supplementary material for: The development and validation of a prognostic prediction modeling study in acute myocardial infarction patients after percutaneous coronary intervention: hemorrhea and major cardiovascular adverse events
Source: PubMed Central journal article supplement — J Thorac Dis. 2024 Sep 26;16(9):6216–28. doi: 10.21037/jtd-24-1362 (PMC11494537; doi:10.21037/jtd-24-1362), 2024-09-26
Supplement: jtd-16-09-6216-supplementary.pdf [file jtd-16-09-6216-supplementary.pdf]

**Table S1** Baseline characteristics of training set and validation set

| Features                                         | Total (n=7931)  | Training set (n=5551) | Validation set (n=2380) | P    |
|--------------------------------------------------|-----------------|-----------------------|-------------------------|------|
| Age, mean ± SD, years                            | 65.78±11.32     | 65.83±11.22           | 65.66±11.54             | 0.55 |
| BMI, mean ± SD, kg/m <sup>2</sup>                | 24.63±5.17      | 24.68±5.17            | 24.53±5.16              | 0.24 |
| Male, n (%)                                      | 5844 (73.69)    | 4101 (73.88)          | 1743 (73.24)            | 0.28 |
| Weight, mean ± SD, kg                            | 68.80±10.07     | 68.87±10.08           | 68.62±10.06             | 0.30 |
| Systolic blood pressure, mean ± SD, mmHg         | 132.77±27.90    | 132.90±27.40          | 132.46±29.05            | 0.52 |
| Diastolic pressure, mean ± SD, mmHg              | 78.25±11.96     | 78.35±11.95           | 78.02±11.98             | 0.27 |
| Heart rate, mean ± SD, bpm                       | 74.57±12.13     | 74.54±12.08           | 74.63±12.23             | 0.77 |
| Medical history, n (%)                           |                 |                       |                         |      |
| Hypertension                                     | 5422 (68.36)    | 3813 (68.69)          | 1609 (67.61)            | 0.34 |
| Diabetes                                         | 2336 (29.45)    | 1621 (29.20)          | 715 (30.04)             | 0.45 |
| Smoke                                            | 3618 (45.62)    | 2538 (45.72)          | 1080 (45.38)            | 0.78 |
| Coronary heart disease                           | 418 (5.27)      | 279 (5.03)            | 139 (5.84)              | 0.14 |
| Previous myocardial infarction                   | 622 (7.84)      | 411 (7.40)            | 211 (8.87)              | 0.03 |
| PCI                                              | 1259 (15.87)    | 865 (15.58)           | 394 (16.55)             | 0.28 |
| CABG                                             | 72 (0.91)       | 51 (0.92)             | 21 (0.88)               | 0.88 |
| Cerebral infarction                              | 944 (11.90)     | 652 (11.75)           | 292 (12.27)             | 0.51 |
| Cerebral hemorrhage                              | 63 (0.79)       | 43 (0.77)             | 20 (0.84)               | 0.76 |
| Peptic ulcer                                     | 282 (3.56)      | 193 (3.48)            | 89 (3.74)               | 0.56 |
| Peripheral vascular disease                      | 180 (2.27)      | 131 (2.36)            | 49 (2.06)               | 0.41 |
| Renal insufficiency                              | 265 (3.34)      | 183 (3.30)            | 82 (3.45)               | 0.74 |
| Heart failure                                    | 406 (5.12)      | 279 (5.03)            | 127 (5.34)              | 0.57 |
| Atrial fibrillation                              | 410 (5.17)      | 297 (5.35)            | 113 (4.75)              | 0.27 |
| Laboratory index, mean ± SD                      |                 |                       |                         |      |
| Hgb, g/L                                         | 136.45±17.83    | 136.45±17.84          | 136.46±17.80            | 0.97 |
| PLT, ×10 <sup>9</sup> /L                         | 198.09±61.55    | 198.52±61.72          | 197.08±61.17            | 0.34 |
| TC, mmol/L                                       | 4.05±1.24       | 4.05±1.13             | 4.05±1.46               | 0.98 |
| TG, mmol/L                                       | 1.65±1.15       | 1.64±1.08             | 1.66±1.30               | 0.52 |
| LDL-C, mmol/L                                    | 2.45±5.00       | 2.48±5.95             | 2.39±0.94               | 0.50 |
| HDL-C, mmol/L                                    | 1.05±0.30       | 1.05±0.29             | 1.05±0.31               | 0.98 |
| Cr, μmol/L                                       | 85.46±73.16     | 85.33±73.66           | 85.78±71.99             | 0.80 |
| Urea, mmol/L                                     | 19.88±69.42     | 20.38±71.02           | 18.73±65.53             | 0.33 |
| ALB, g/L                                         | 39.41±5.90      | 39.40±6.27            | 39.43±4.94              | 0.86 |
| PT, s                                            | 12.34±2.05      | 12.34±2.07            | 12.33±2.03              | 0.90 |
| APTT, s                                          | 30.19±9.16      | 30.17±8.54            | 30.25±10.48             | 0.72 |
| INR                                              | 1.08±1.27       | 1.07±0.39             | 1.12±2.25               | 0.10 |
| ALT, U/L                                         | 34.19±65.34     | 33.87±64.71           | 34.95±66.80             | 0.50 |
| AST, U/L                                         | 50.91±134.28    | 50.85±140.42          | 51.03±118.75            | 0.96 |
| Creatinine clearance, mL/min/1.73 m <sup>2</sup> | 82.58±28.82     | 82.75±28.87           | 82.18±28.72             | 0.42 |
| Fasting blood glucose, mmol/L                    | 6.16±5.81       | 6.10±2.34             | 6.33±9.99               | 0.10 |
| WBC, ×10 <sup>9</sup> /L                         | 7.42±2.80       | 7.43±2.82             | 7.41±2.76               | 0.71 |
| pro-BNP, pg/mL                                   | 1437.58±3555.50 | 1408.83±3328.89       | 1504.65±4034.85         | 0.27 |
| Lp(a), mg                                        | 295.30±229.81   | 292.92±234.45         | 300.83±218.54           | 0.16 |
| Left ventricular ejection fraction, %            | 59.50±7.81      | 59.51±7.67            | 59.45±8.19              | 0.79 |
| Treatment                                        |                 |                       |                         |      |
| Bare stent, n (%)                                |                 |                       |                         | 0.28 |
| 0                                                | 7724 (97.39)    | 5397 (97.23)          | 2327 (97.77)            |      |
| 1                                                | 191 (2.41)      | 143 (2.58)            | 48 (2.02)               |      |
| 2                                                | 11 (0.14)       | 8 (0.14)              | 3 (0.13)                |      |
| 3                                                | 3 (0.04)        | 1 (0.02)              | 2 (0.08)                |      |
| 4                                                | 2 (0.03)        | 2 (0.04)              | 0 (0.00)                |      |
| Drug eluting stent, n (%)                        | 7185 (90.59)    | 5012 (90.29)          | 2173 (91.30)            | 0.16 |
| Stent position, n (%)                            |                 |                       |                         | 0.38 |
| LAD                                              | 3195 (40.28)    | 2191 (39.47)          | 1004 (42.18)            |      |
| LCX                                              | 724 (9.13)      | 501 (9.03)            | 223 (9.37)              |      |
| RCA                                              | 1534 (19.34)    | 1091 (19.65)          | 443 (18.61)             |      |
| LAD+LCX                                          | 877 (11.06)     | 624 (11.24)           | 253 (10.63)             |      |
| LAD+RCA                                          | 805 (10.15)     | 572 (10.30)           | 233 (9.79)              |      |
| LCX+RCA                                          | 455 (5.74)      | 327 (5.89)            | 128 (5.38)              |      |
| LAD+LCX+RCA                                      | 220 (2.77)      | 154 (2.77)            | 66 (2.77)               |      |
| LM                                               | 121 (1.53)      | 91 (1.64)             | 30 (1.26)               |      |
| Number of stents, mean ± SD                      | 1.77±1.05       | 1.78±1.06             | 1.75±1.04               | 0.32 |
| Drug balloon, n (%)                              |                 |                       |                         | 0.47 |
| 0                                                | 6139 (77.41)    | 4275 (77.01)          | 1864 (78.32)            |      |
| 1                                                | 1768 (22.29)    | 1260 (22.70)          | 508 (21.34)             |      |
| 2                                                | 20 (0.25)       | 13 (0.23)             | 7 (0.29)                |      |
| 3                                                | 2 (0.03)        | 2 (0.04)              | 0 (0.00)                |      |
| 4                                                | 2 (0.03)        | 1 (0.02)              | 1 (0.04)                |      |
| Discharge medications, n (%)                     |                 |                       |                         |      |
| Bayaspirin + Plavix                              | 4635 (58.44)    | 3239 (58.35)          | 1396 (58.66)            | 0.80 |
| Bayaspirin + Ticagrelor                          | 3295 (41.56)    | 2312 (41.65)          | 983 (41.30)             | 0.77 |
| ACEI/ARB                                         | 3487 (43.97)    | 2455 (44.23)          | 1032 (43.36)            | 0.48 |
| β-blockers                                       | 4952 (62.44)    | 3481 (62.71)          | 1471 (61.81)            | 0.45 |
| Statins                                          | 7170 (90.40)    | 4994 (89.97)          | 2176 (91.43)            | 0.04 |
| Warfarin                                         | 103 (1.30)      | 69 (1.24)             | 34 (1.43)               | 0.50 |
| PPI                                              | 3394 (42.79)    | 2360 (42.51)          | 1034 (43.45)            | 0.44 |

SD, standard deviation; BMI, body mass index; PCI, percutaneous coronary intervention; CABG, coronary artery bypass grafting; Hgb, hemoglobin; PLT, platelet; TC, total cholesterol; TG, triglyceride; LDL-C, low density lipoprotein cholesterol; HDL-C, high density lipoprotein cholesterol; Cr, creatinine; ALB, albumin; PT, prothrombin time; APTT, activated partial thromboplastin time; INR, international normalized ratio; ALT, alanine aminotransferase; AST, aspartate aminotransferase; WBC, white blood cell; BNP, brain natriuretic peptides; Lp(a), lipoprotein(a); LAD, left anterior descending artery; LCX, left circumflex artery; RCA, right coronary artery; LM, left main artery; ACEI/ARB, angiotensin-converting enzyme inhibitors/angiotensin II receptor blockers; PPI, proton pump inhibitor.
